# Supplementary material for: Quantitative diagnosis of breast tumors by morphometric classification of microenvironmental myoepithelial cells using a machine learning approach
Source: PubMed Central journal article supplement (PMC5404264; doi:10.1038/srep46732), 2017-04-25

## **Supplementary Materials**

### **Quantitative diagnosis of breast tumors by morphometric classification of microenvironmental myoepithelial cells using a machine learning approach**

Yoichiro Yamamoto, § 1,2,3,4 Akira Saito, § 4,5,6 Ayako Tateishi,<sup>1</sup> Hisashi Shimojo,<sup>1</sup> Hiroyuki Kanno,<sup>1</sup> Shinichi Tsuchiya,<sup>7</sup>

Ken-ichi Ito,<sup>8</sup> Eric Cosatto,<sup>9</sup> Hans Peter Graf,<sup>9</sup> Rodrigo R. Moraleda,<sup>10,11</sup> Roland Eils<sup>2,3</sup> and Niels Grabe<sup>12,13</sup>

§ Both authors contributed equally to this work

<sup>1</sup> Department of Pathology, Shinshu University School of Medicine, Nagano, Japan.

<sup>2</sup> Division of Theoretical Bioinformatics, German Cancer Research Center (DKFZ), Heidelberg, Germany.

<sup>3</sup> Department for Bioinformatics and Functional Genomics, Institute of Pharmacy and Molecular Biotechnology (IPMB) and Bioquant, University of Heidelberg, Heidelberg, Germany.

<sup>4</sup> RIKEN Center for Advanced Intelligence Project, Pathology Informatics Unit, Tokyo, Japan.

<sup>5</sup> Quantitative Pathology & Immunology, Tokyo Medical University, Shinjuku, Tokyo, Japan.

<sup>6</sup> Department of Molecular Pathology, Tokyo Medical University, Shinjuku, Tokyo, Japan.

<sup>7</sup> Diagnostic Pathology, Ritsuzankai Iida Hospital, Nagano, Japan.

<sup>8</sup> Division of Breast and Endocrine Surgery, Shinshu University School of Medicine, Nagano, Japan.

<sup>9</sup> Department of Machine Learning, NEC Laboratories America, NJ, USA.

<sup>10</sup> Applied Tumor Immunity Clinical Cooperation Unit, National Center for Tumor Diseases, German Cancer Research Center, Heidelberg, Germany.

<sup>11</sup> Department of informatics, Technical University Federico Santa Maria Valparaiso, Chile.

<sup>12</sup> Department of Medical Oncology, National Center for Tumor Diseases, University of Heidelberg, Heidelberg, Germany.

<sup>13</sup> Hamamatsu Tissue Imaging and Analysis Center, Bioquant, University of Heidelberg, Heidelberg, Germany.

**Table S1. Characteristics of objects.**

**Total number of nuclei: 11661**

|         | Cells (p63) | Cells (HE) | ROIs (p63) | ROIs (HE) | Cases | Age       |
|---------|-------------|------------|------------|-----------|-------|-----------|
| Normal  | 2749        | 1289       | 14         | 14        | 7     | 65.4±13.9 |
| UDH     | 2307        | 1073       | 16         | 16        | 5     | 56.6±7.6  |
| LG-DCIS | 1819        | 666        | 21         | 21        | 5     | 65.0±15.6 |
| HG-DCIS | 1203        | 555        | 19         | 19        | 5     | 63.8±11.6 |

(Mean±S.D.)

UDH: Usual ductal hyperplasia

LG-DCIS: Low Grade Ductal carcinoma in situ

HG-DCIS: High Grade Ductal carcinoma in situ

**Table S2. Analyzed ROIs**

|         | Total<br>Cases | ROIs  |       |       |       |       |       |       |
|---------|----------------|-------|-------|-------|-------|-------|-------|-------|
|         |                | Case1 | Case2 | Case3 | Case4 | Case5 | Case6 | Case7 |
| Normal  | 7              | 2     | 2     | 2     | 2     | 2     | 2     | 2     |
| UDH     | 5              | 4     | 2     | 3     | 3     | 4     |       |       |
| DCIS G1 | 5              | 4     | 7     | 4     | 4     | 2     |       |       |
| DCIS G3 | 5              | 4     | 3     | 5     | 3     | 4     |       |       |

**Table S3. Morphological features****Area & Shape**

|                        |                  |                  |                         |                        |
|------------------------|------------------|------------------|-------------------------|------------------------|
| Area                   | Compactness      | Eccentricity     | Form Factor             | Major Axis Length      |
| Maximum Feret Diameter | Maximum Radius   | Mean Radius      | Median Radius           | Minimum Feret Diameter |
| Minor Axis Length      | Perimeter        | Solidity         | Ratio of Feret Diameter | Ratio of Axis Length   |
| FracAtD<br>1of4*       | FracAtD<br>2of4* | FracAtD<br>3of4* | FracAtD<br>4of4*        |                        |

**Nuclear texture (GLCM)**

|                       |                               |                               |                           |                     |
|-----------------------|-------------------------------|-------------------------------|---------------------------|---------------------|
| Angular Second Moment | Contrast                      | Correlation                   | Difference Entropy        | Difference Variance |
| Entropy               | Info. Measure of Correlation1 | Info. Measure of Correlation2 | Inverse Difference Moment | Sum Average         |
| Sum Entropy           | Sum Variance                  | Variance                      |                           |                     |

\* FracAtD: Fraction of total stain in an object at a given radius. The distribution is measured from the center of the object, where the center is defined as the point farthest from any edge. The numbering is from 1 (innermost) to 4 (outermost).

**Table S4. Possible candidate molecules of crosstalk between luminal cells and myoepithelial cells.**

| <b>Ligand<br/>(Luminal cell)</b> | <b>Receptor<br/>(Myoepithelial cell)</b> |
|----------------------------------|------------------------------------------|
| ADAM15, ADAM17, COL18A1          | ITGB1                                    |
| CDH1                             | ITGB7                                    |
| DUSP18                           | ITGA3                                    |
| DUSP18                           | ITGA7                                    |
| FN1                              | SDC2                                     |
| IL15                             | IL15RA                                   |
| <b>SLIT2</b>                     | <b>ROBO1</b>                             |
| <b>SHH</b>                       | <b>SMO</b>                               |
| WNT7B                            | FZD1                                     |

# Figure S1

1. Raw data (Serial sections of p63 IHC slides)

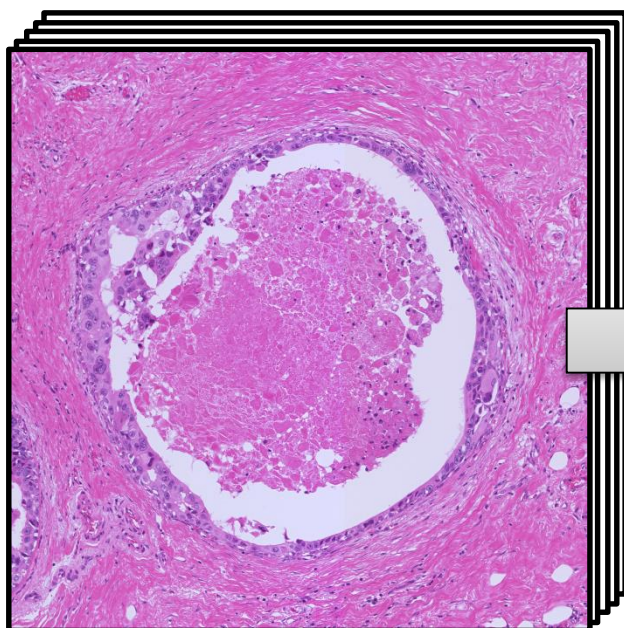

2. Segmentation of all cells by program of NEC

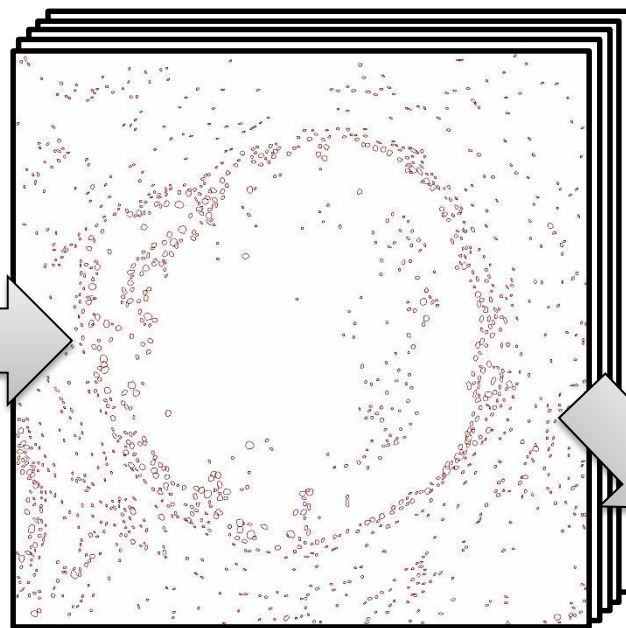

3. Manually picking up myoepithelial cells

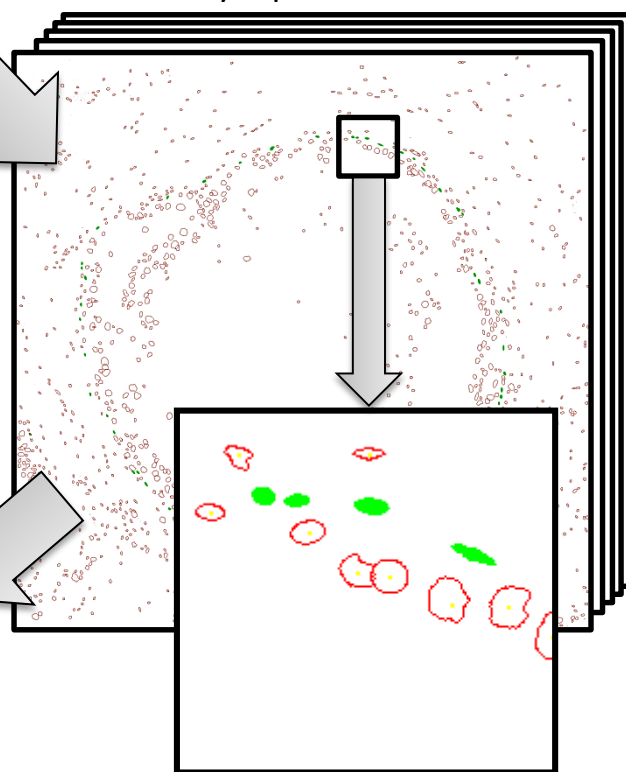

5. Classification (SVM) & Mapping

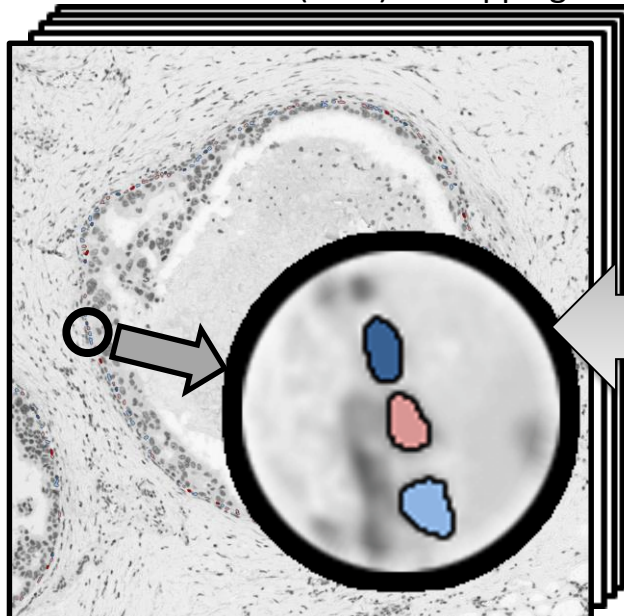

4. Measurement by CellProfiler

| No. | Area | Compactness | Eccentricity | Extent   | FormFactor | MajorAxis | MaxFeretD |
|-----|------|-------------|--------------|----------|------------|-----------|-----------|
| 1   | 153  | 1.774397    | 0.948938     | 0.68     | 0.537721   | 25.12586  | 24.18877  |
| 2   | 156  | 1.264323    | 0.86517      | 0.619048 | 0.738498   | 20.09701  | 19.72308  |
| 3   | 134  | 1.708976    | 0.911633     | 0.553719 | 0.389348   | 22.39436  | 21.0238   |
| 4   | 147  | 1.648768    | 0.932858     | 0.480392 | 0.566413   | 23.42876  | 23.34524  |
| 5   | 126  | 1.441525    | 0.913324     | 0.7875   | 0.660322   | 19.98287  | 19.41649  |
| 6   | 87   | 1.542556    | 0.914052     | 0.639706 | 0.59216    | 17.20261  | 16.12452  |
| 7   | 85   | 1.681075    | 0.90786      | 0.664063 | 0.56573    | 17.66234  | 15.52417  |
| 8   | 142  | 1.623574    | 0.91986      | 0.44375  | 0.379272   | 22.61481  | 21.47091  |
| 9   | 86   | 1.661746    | 0.933837     | 0.632353 | 0.55903    | 18.03145  | 16.12452  |
| 10  | 94   | 2.959781    | 0.980617     | 0.29375  | 0.404999   | 26.16462  | 23.6008   |
| 11  | 107  | 2.002178    | 0.960625     | 0.607955 | 0.453488   | 22.56063  | 21.37758  |
| 12  | 134  | 2.143986    | 0.968961     | 0.408061 | 0.487632   | 26.256    | 24.6981   |
| 13  | 129  |             |              |          |            |           | 24.1660   |
| 14  | 129  |             |              |          |            |           | 21.3775   |
| 15  | 227  |             |              |          |            |           | 24.6981   |
| 16  | 81   |             |              |          |            |           | 22.47221  |
| 17  | 89   |             |              |          |            |           | 17.02939  |
| 18  | 128  |             |              |          |            |           | 23.85372  |
| 19  | 119  |             |              |          |            |           | 22.36068  |
| 20  | 162  |             |              |          |            |           | 17.80449  |
| 21  | 87   |             |              |          |            |           | 17.26268  |
| 22  | 152  |             |              |          |            |           | 17.80449  |
| 23  | 102  |             |              |          |            |           | 18.78829  |
| 24  | 132  |             |              |          |            |           | 16.12452  |
| 25  | 138  |             |              |          |            |           | 18.60108  |
| 26  | 87   | 0.988378    | 0.930842     | 0.621923 | 0.521284   | 20.20003  | 19.23538  |
| 27  | 90   | 2.050249    | 0.962401     | 0.592105 | 0.553329   | 20.97888  | 18.68154  |
| 28  | 107  | 1.619323    | 0.936211     | 0.509524 | 0.627779   | 19.88177  | 19.10497  |
| 29  | 128  | 1.47595     | 0.904151     | 0.547009 | 0.625903   | 20.23429  | 18.86796  |
| 30  | 110  | 1.674226    | 0.918816     | 0.482456 | 0.505745   | 20.20779  | 18.24829  |
| 31  | 179  | 1.059069    | 0.614502     | 0.699219 | 0.775235   | 17.31132  | 17.20465  |
| 32  | 192  | 2.348707    | 0.971567     | 0.347988 | 0.44822    | 27.37905  | 24.83948  |
| 33  | 86   | 1.187822    | 0.816857     | 0.735043 | 0.766295   | 14.04825  | 13.41841  |
| 34  | 86   | 1.132375    | 0.730476     | 0.735043 | 0.763446   | 13.08082  | 12.16553  |
| 35  | 159  | 1.178992    | 0.827222     | 0.623529 | 0.801271   | 19.11294  | 17.80449  |
| 36  | 94   | 1.248771    | 0.851312     | 0.696296 | 0.745863   | 15.38524  | 14.86607  |
| 37  | 156  | 1.264323    | 0.86517      | 0.619048 | 0.738498   | 20.09701  | 19.72308  |
| 38  | 134  | 1.708976    | 0.911633     | 0.553719 | 0.389348   | 22.39436  | 21.0238   |
| 39  | 147  | 1.648768    | 0.932858     | 0.480392 | 0.566413   | 23.42876  | 23.34524  |

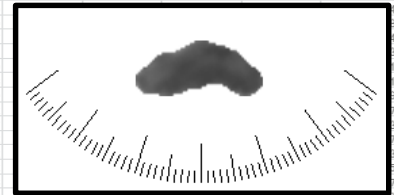

# Figure S2

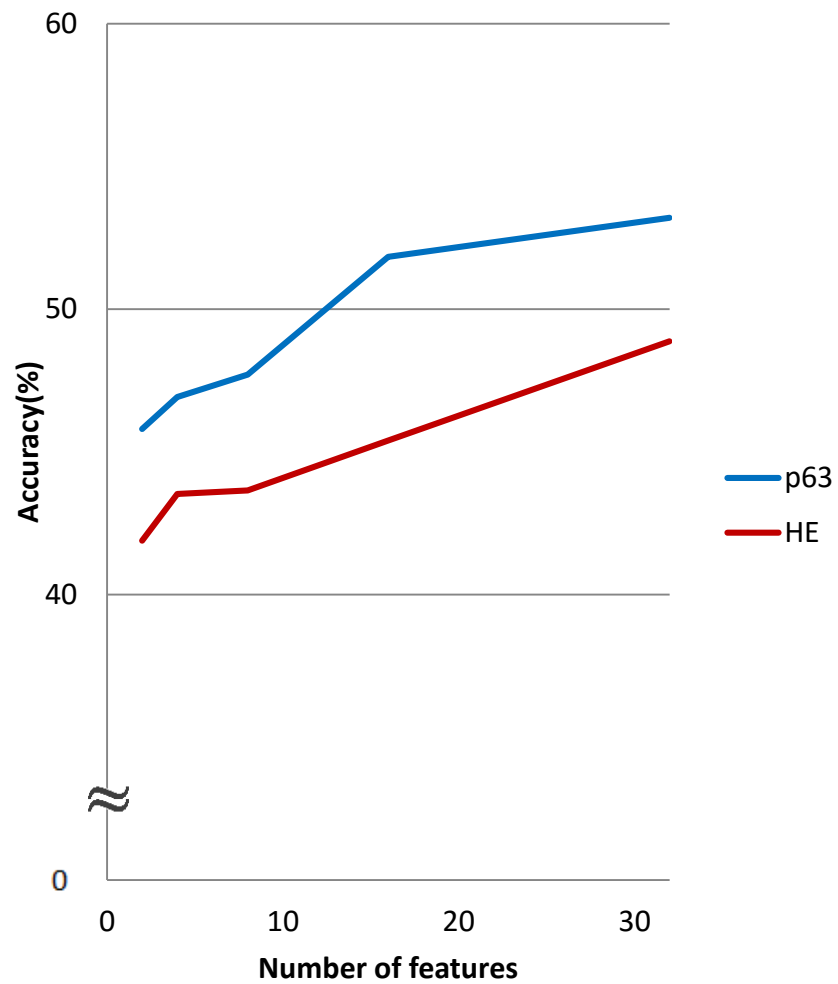

# Figure S3

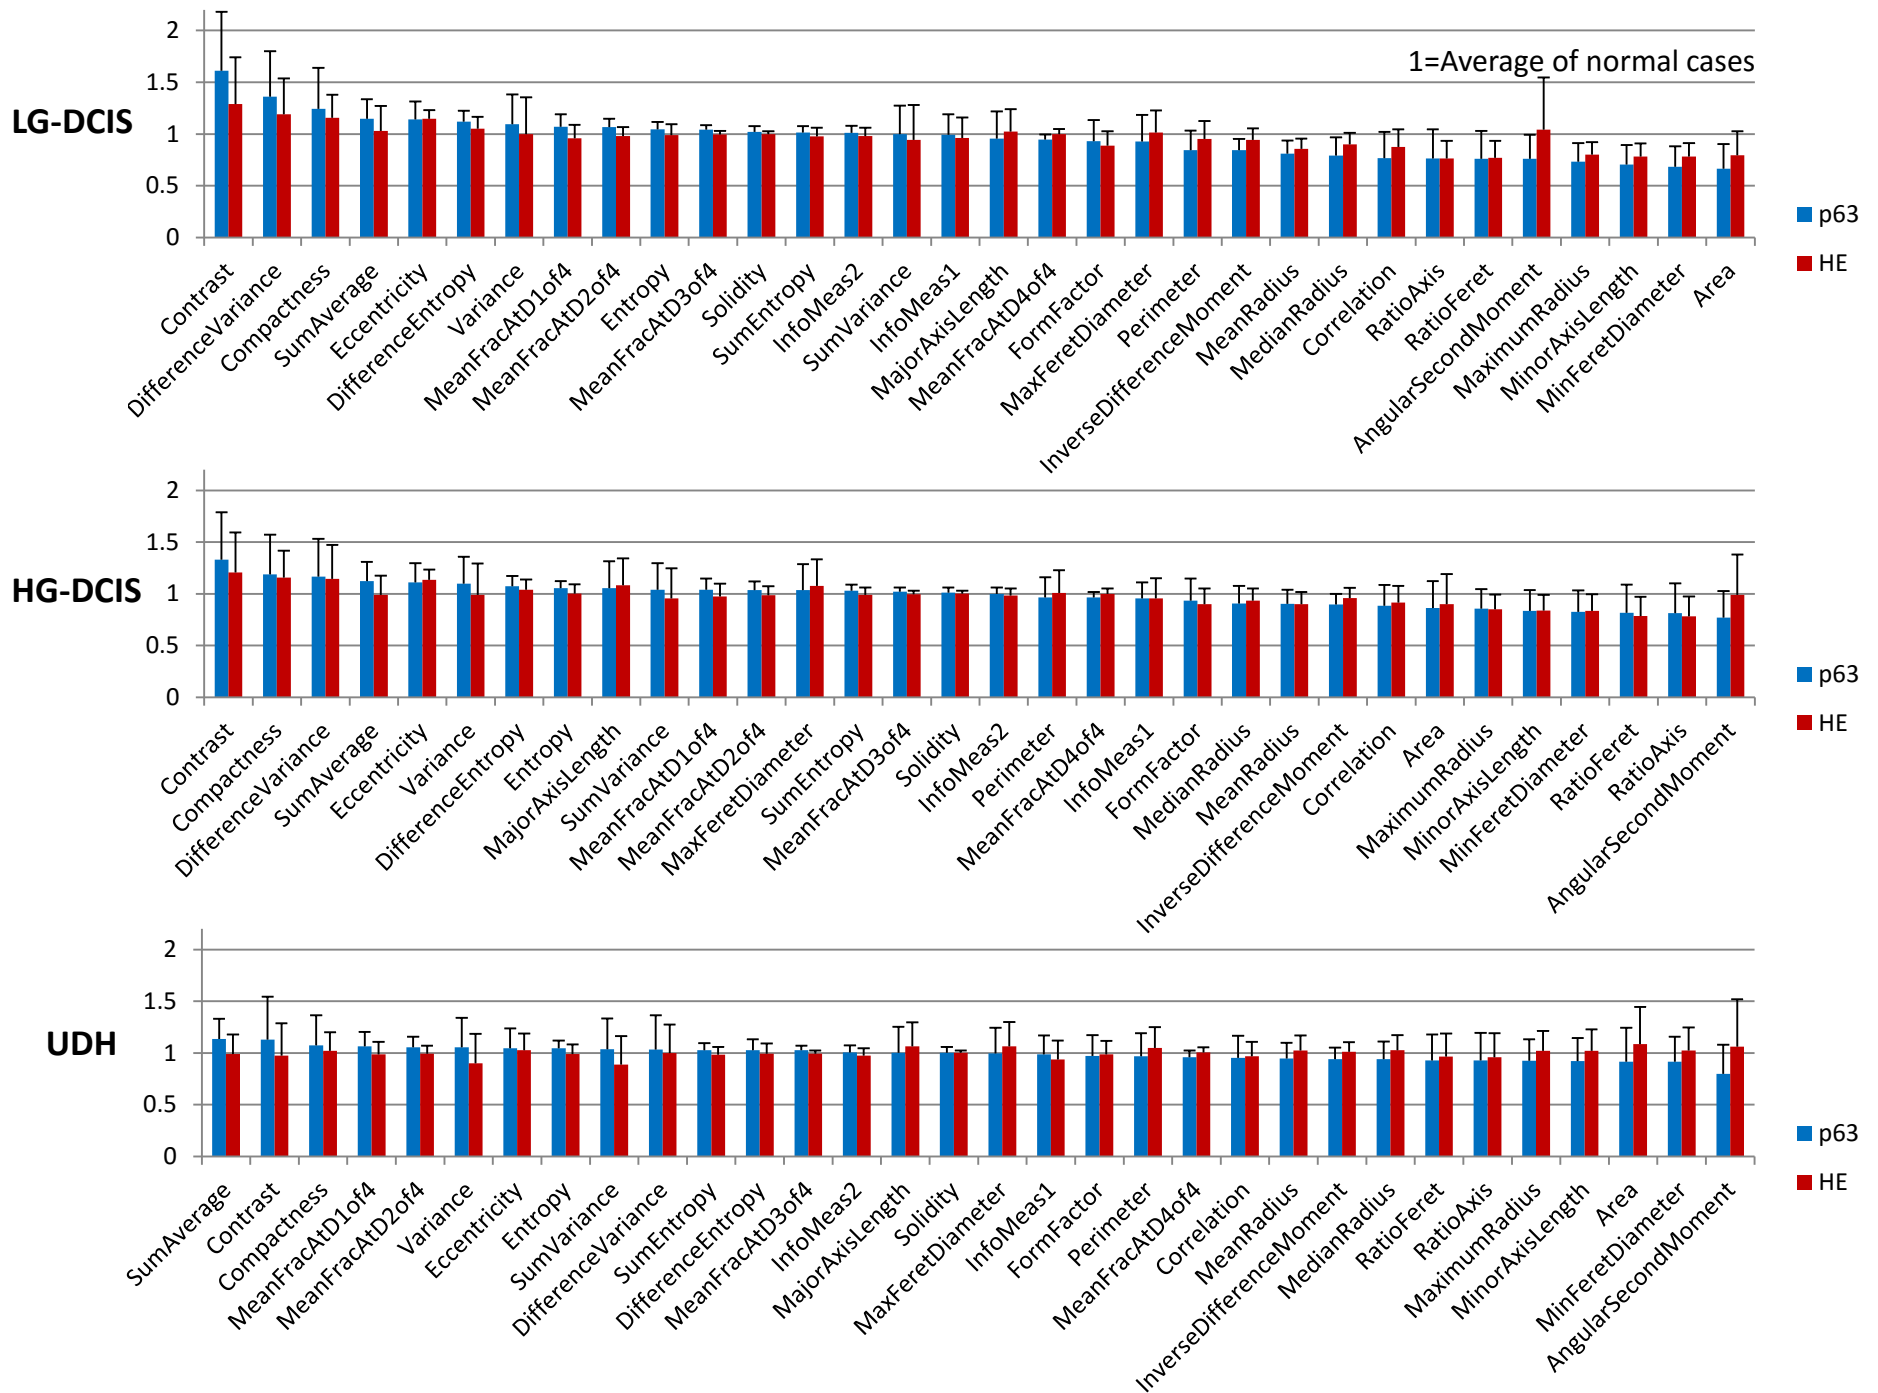



**Figure S4**

**Normal**

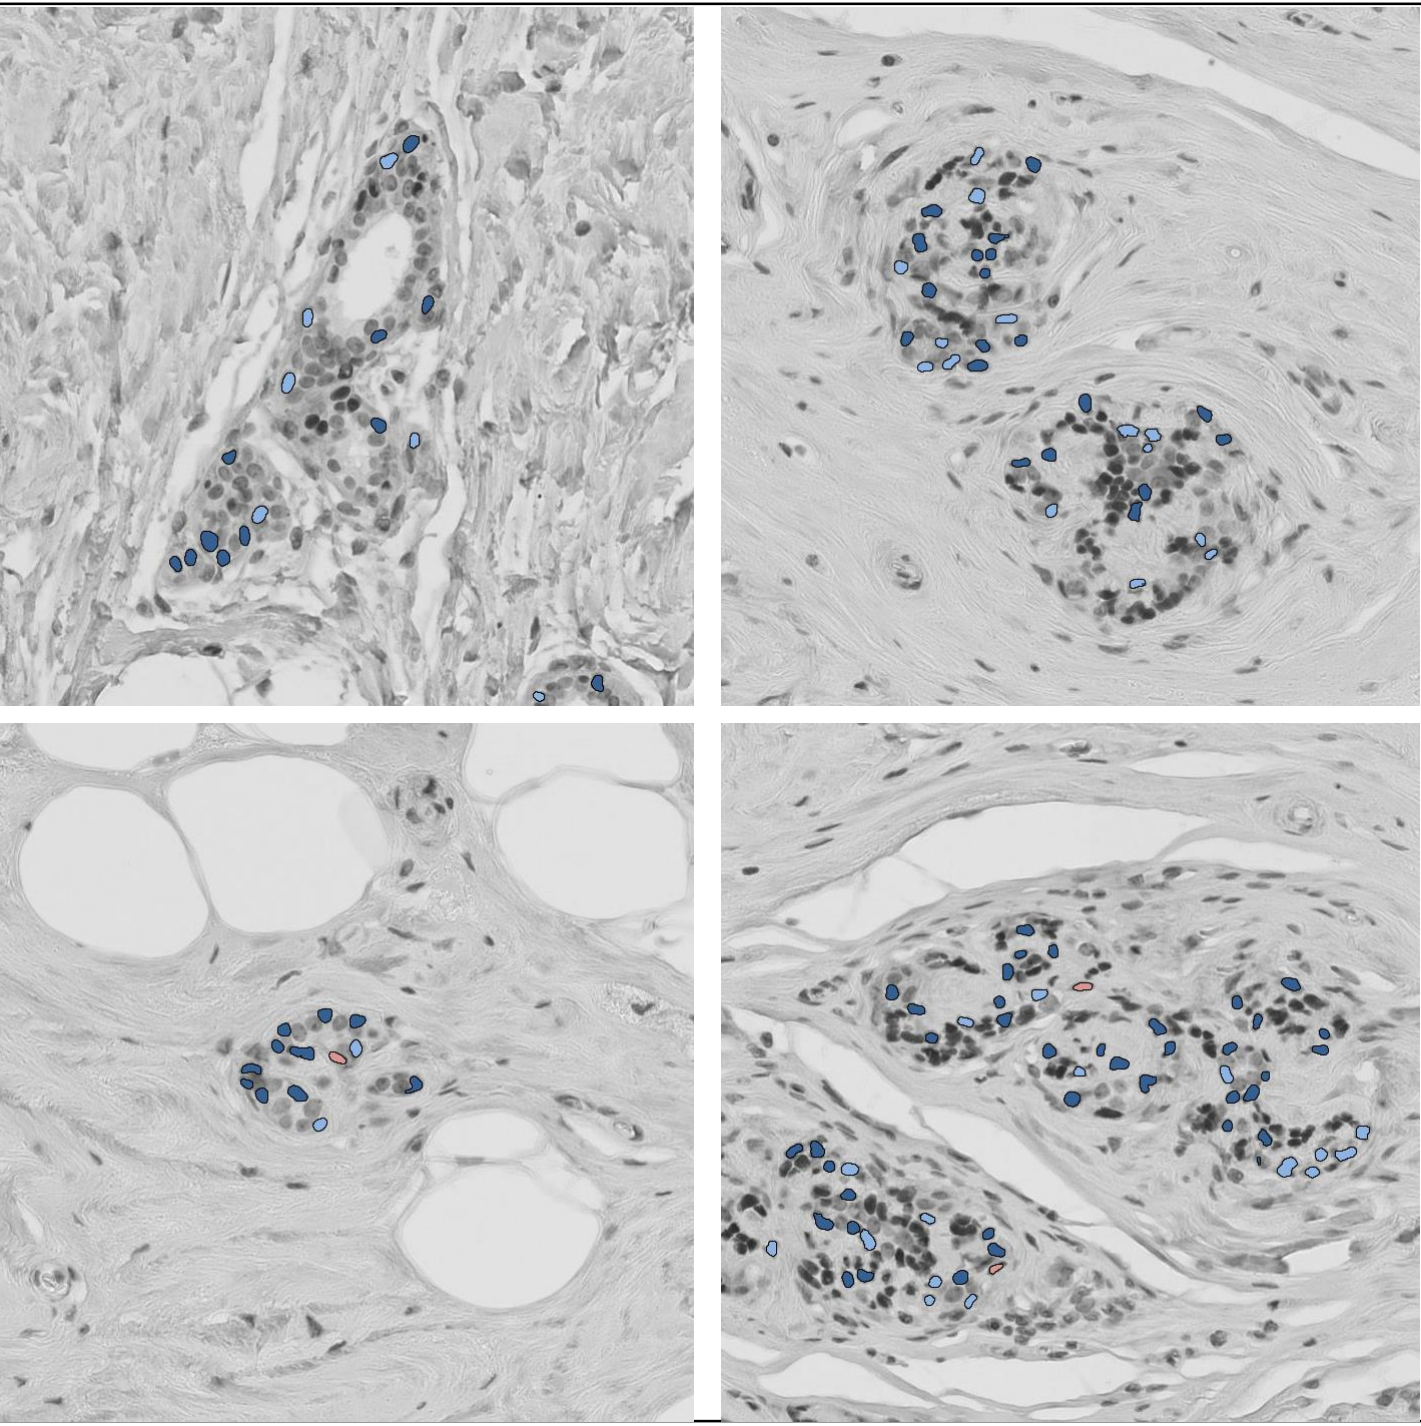

**LG-DCIS**

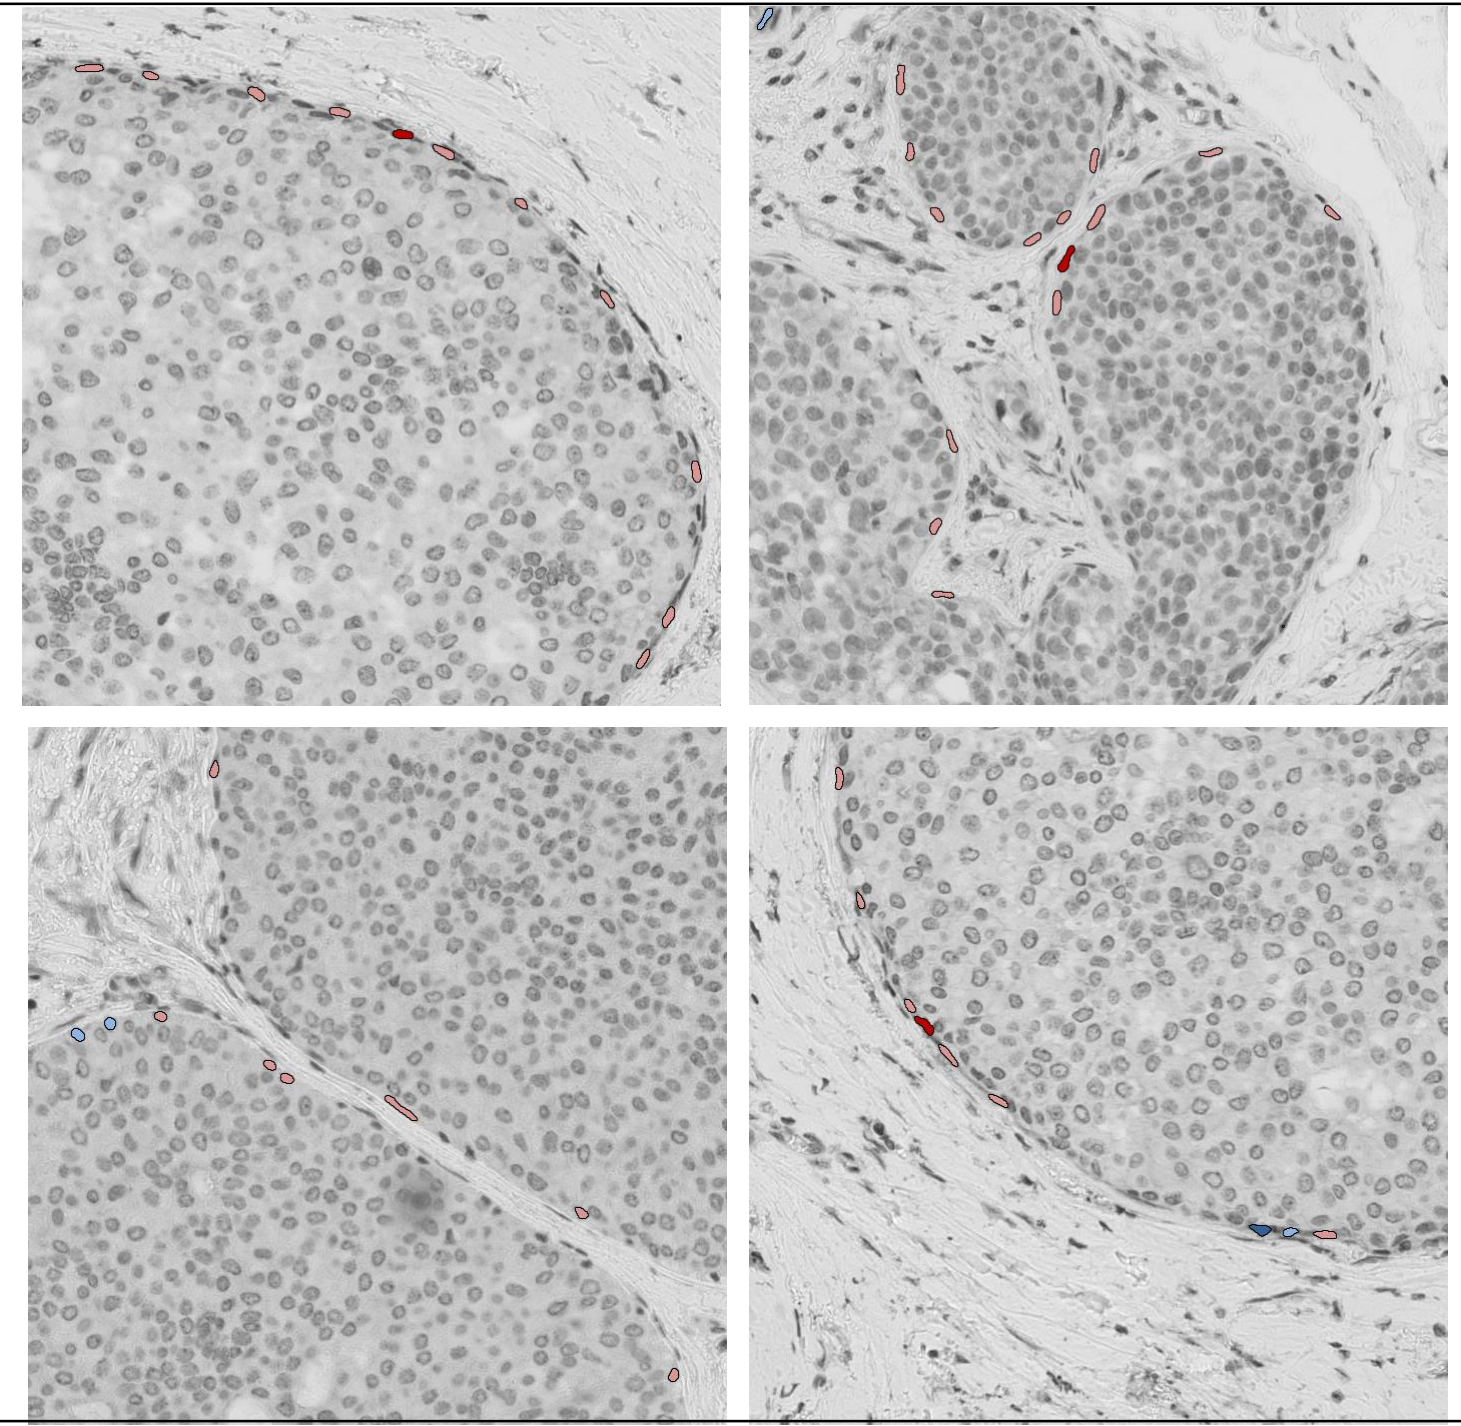

**UDH**

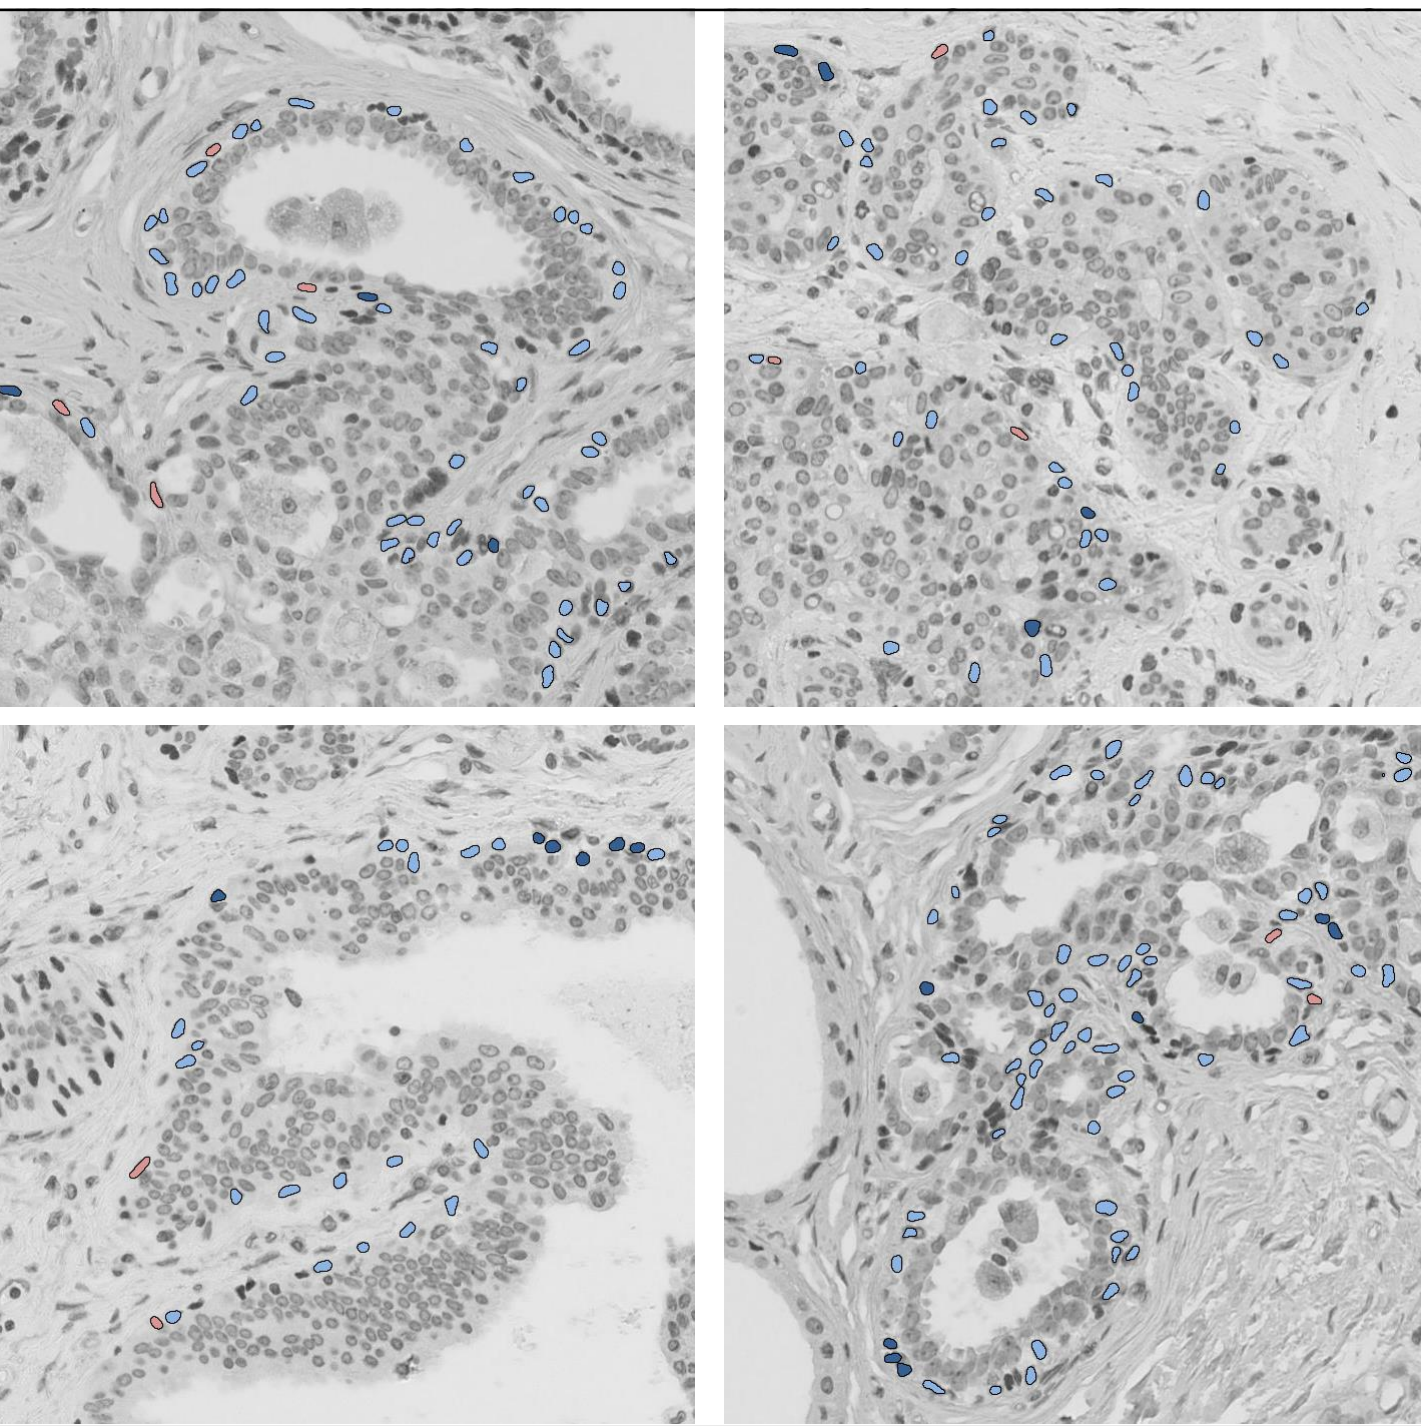

**HG-DCIS**

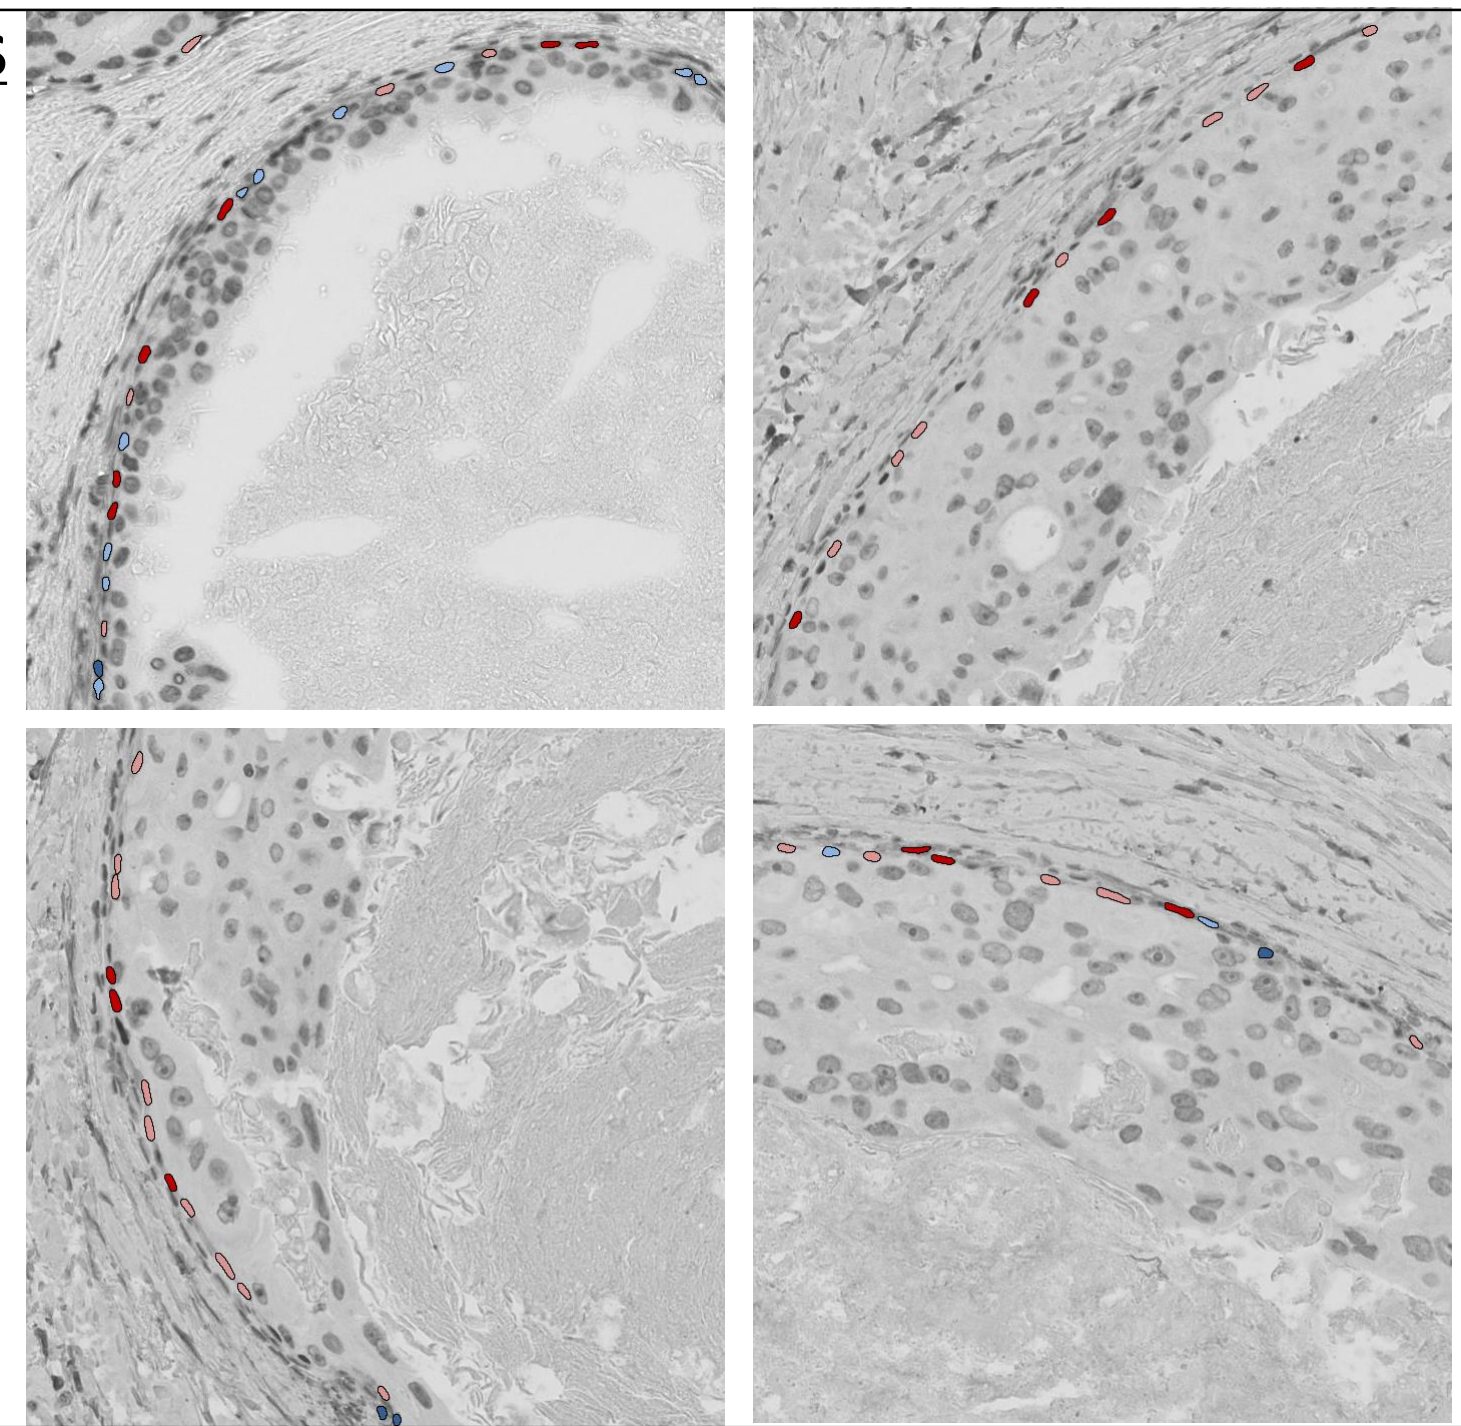



# Figure S5

## A

### SHH

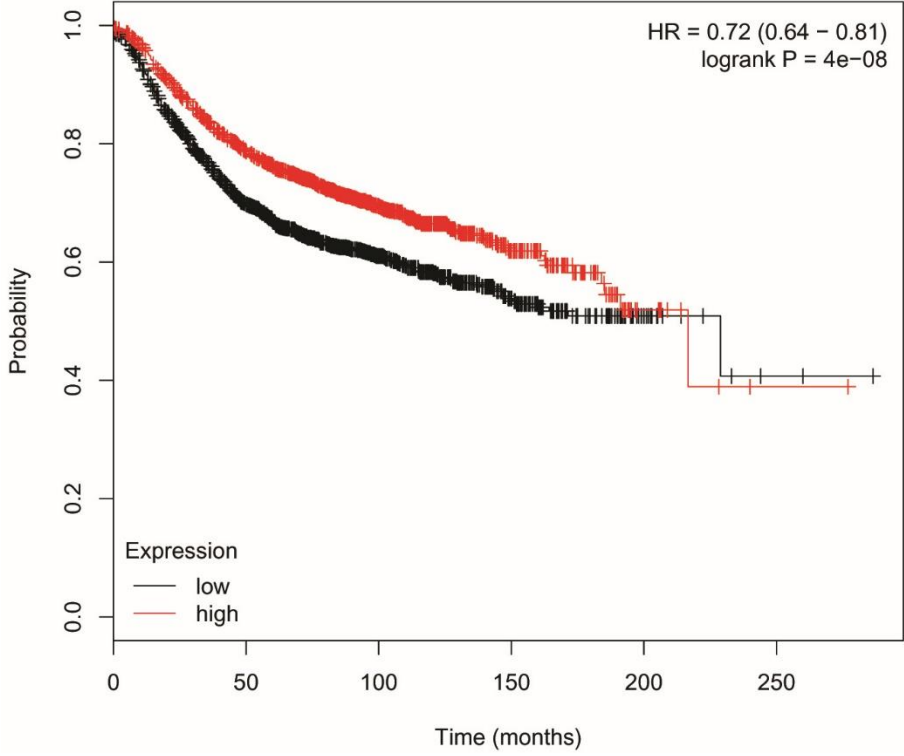

## B

### SLIT2

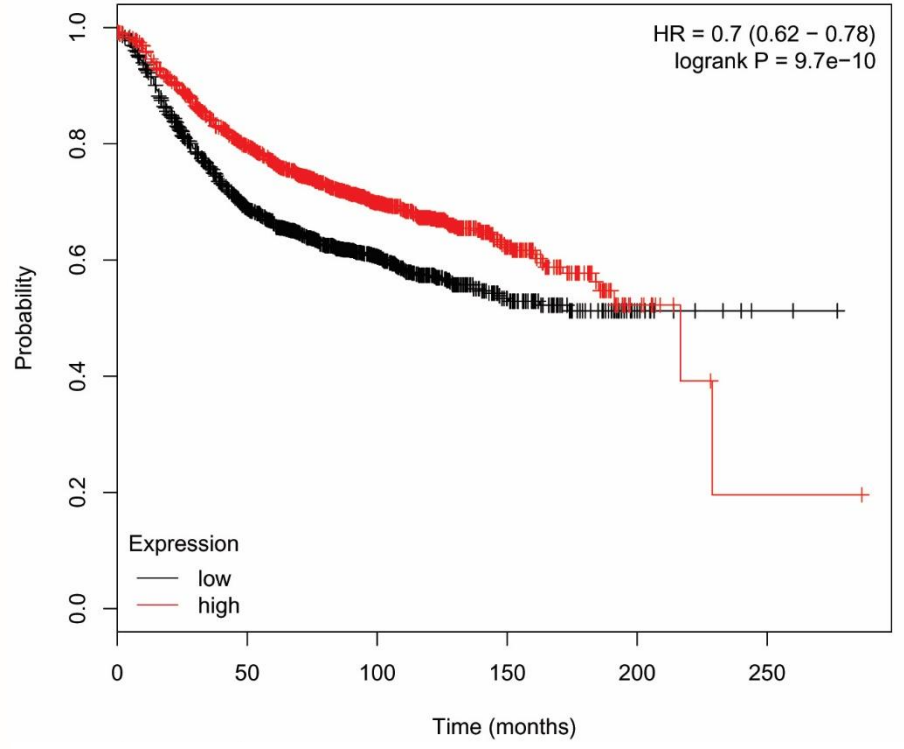

Supplement: srep46732-s1.pdf [file srep46732-s1.pdf]
